# Supplementary material for: Bleaching protection and axial sectioning in fluorescence nanoscopy through two-photon activation at 515 nm
Source: PubMed Central journal article supplement (PMC11362616; doi:10.1038/s41467-024-51160-9), 2024-08-29
Supplement: 41467_2024_51160_MOESM3_ESM.pdf [file 41467_2024_51160_MOESM3_ESM.pdf]

**Supplementary Movie 1.**

**Two-photon activation STED in mouse brain slice.** 1PA (left) vs. 2PA (right) STED recordings of actin in cortical layer V neurons within a paraformaldehyde-fixed brain slice (compare Fig. 4a,b and Supplementary Fig. 5). Nine steps of  $\Delta z = 200$  nm were recorded, and this recorded sequence is displayed repeated 3 times within the movie.
